# Supplementary material for: Organosilane-assisted synthesis of ordered mesoporous poly(furfuryl alcohol) composites
Source: Royal Society of Chemistry journal article supplement (doi:10.1039/b813688b), 2008-11-12
Supplement: b813688b.pdf [file b813688b.pdf]

## Supporting information

# Organosilane-assisted Synthesis of Ordered Mesoporous Poly(furfuryl alcohol) Composites

*Yunpu Zhai, Bo Tu and Dongyuan Zhao\**

Department of Chemistry, Shanghai Key Laboratory of Molecular Catalysis and Innovative Materials, Key Laboratory of Molecular Engineering of Polymers of the Chinese Ministry of Education, Laboratory of Advanced Materials, Fudan University, Shanghai 200433, P. R. China

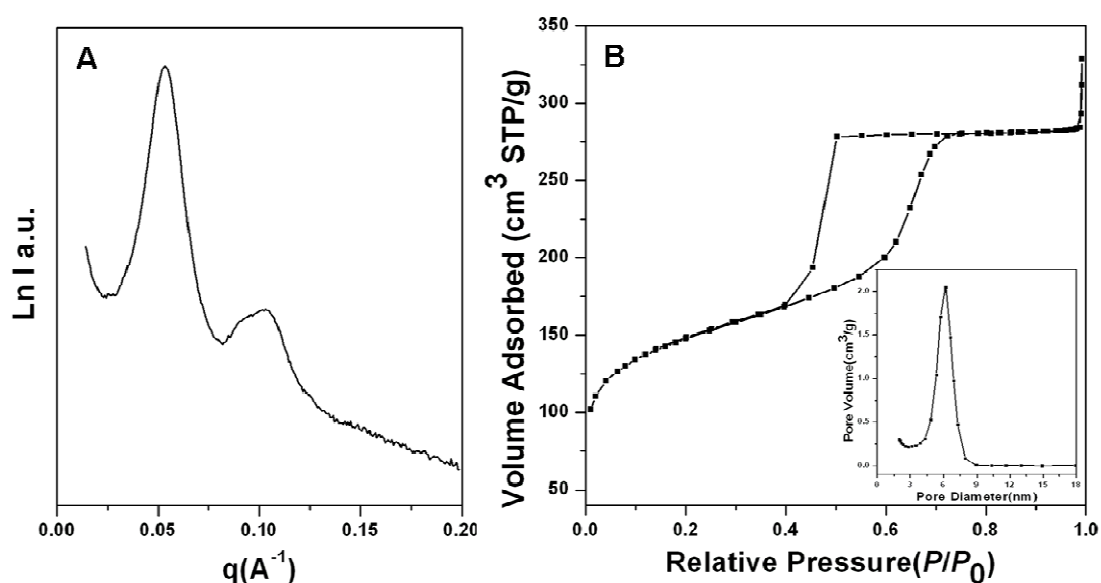

**Figure S1.** SAXS pattern (A), nitrogen adsorption-desorption isotherms (B) and corresponding pore size distribution (B, inset) of mesoporous siliceous  $\text{MSiO}_2$ .
